# Supplementary material for: Multifunctional amphiphilic ionic liquid pathway to create water-based magnetic fluids and magnetically-driven mesoporous silica
Source: Royal Society of Chemistry journal article supplement (doi:10.1039/c8ra10065a), 2019-01-01
Supplement: c8ra10065a1.pdf [file c8ra10065a1.pdf]

## Supplementary Material

### Multifunctional Amphiphilic Ionic Liquid Pathway to Create Water-Based Magnetic Fluids and Magnetically-Driven Mesoporous Silica

Jing Shen\*<sup>a</sup>, Wen He<sup>b</sup> and Tongwen Wang<sup>b</sup>

<sup>a</sup>Department of Applied Chemistry, College of Vocational Education, Yunnan Normal University, Kunming 650092, P. R. China. Email: shenjingbox0225@hotmail.com.

<sup>b</sup>College of Chemistry and Chemical Engineering, Yunnan Normal University, Kunming 650092, P. R. China.

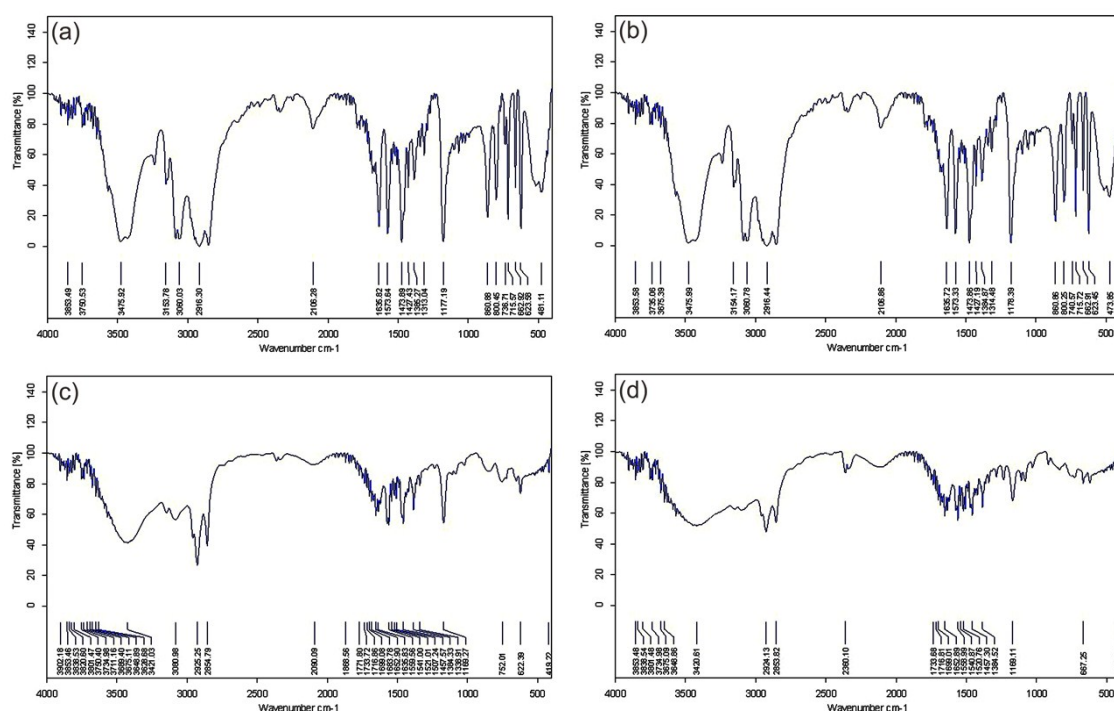

that, the two characteristic bands around  $3155\text{ cm}^{-1}$  and  $3142\text{ cm}^{-1}$ , which can be assigned to the symmetric  $\nu_s$  CH(4, 5) and asymmetric  $\nu_{as}$  CH(4, 5) stretch of in positions four and five of the imidazolium ring (ref. B. D. Fitchett, J. C. Conboy, *J. Phys. Chem.* 2004, **108**, 20255.). The peaks around  $3060\text{ cm}^{-1}$  are contribution from the asymmetric stretching  $\nu_{as}$  N-CH<sub>3</sub> of the methyl group bound to the imidazolium ring. The next strong bands at  $2915\text{ cm}^{-1}$  and  $2853\text{ cm}^{-1}$  can be assigned to the antisymmetric  $\nu_{as}$  CH<sub>2</sub> and symmetric  $\nu_s$  CH<sub>2</sub> stretching modes of the alkyl chain. The analysis of other vibration mode assignment can be seen in our early work.<sup>26</sup> Therefore, the results allow conclusion that the C<sub>16</sub>mimCl with imidazolium ring and alkyl chain was synthesized. For other C<sub>14</sub>mimCl (Fig. S1b), C<sub>12</sub>mimCl (Fig. S1c) and C<sub>10</sub>mimCl (Fig. S1d), analogous results can be obtained. However, the intensity of these peaks decreased with decreasing the value of  $n$ .

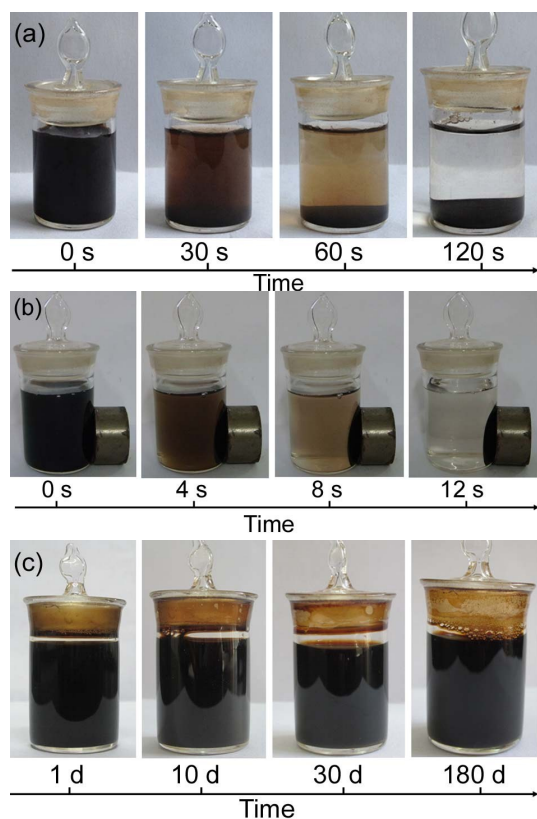

**Fig. S2** Digital photographs of (a) natural sedimentation of Fe<sub>3</sub>O<sub>4</sub>/C<sub>10</sub>mimCl, (b) magnetically separable state of Fe<sub>3</sub>O<sub>4</sub>/C<sub>10</sub>mimCl and (c) Fe<sub>3</sub>O<sub>4</sub>/C<sub>10</sub>mimCl/C<sub>16</sub>mimCl dispersion at different time.

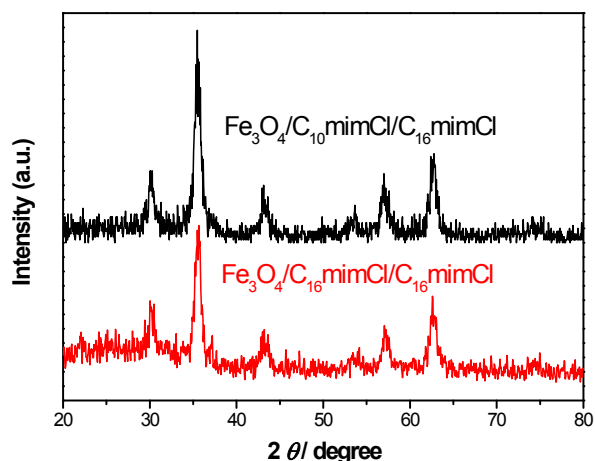

**Fig. S3** Wide-angle XRD patterns of  $\text{Fe}_3\text{O}_4/\text{C}_{10}\text{mimCl}/\text{C}_{16}\text{mimCl}$  and  $\text{Fe}_3\text{O}_4/\text{C}_{16}\text{mimCl}/\text{C}_{16}\text{mimCl}$ .

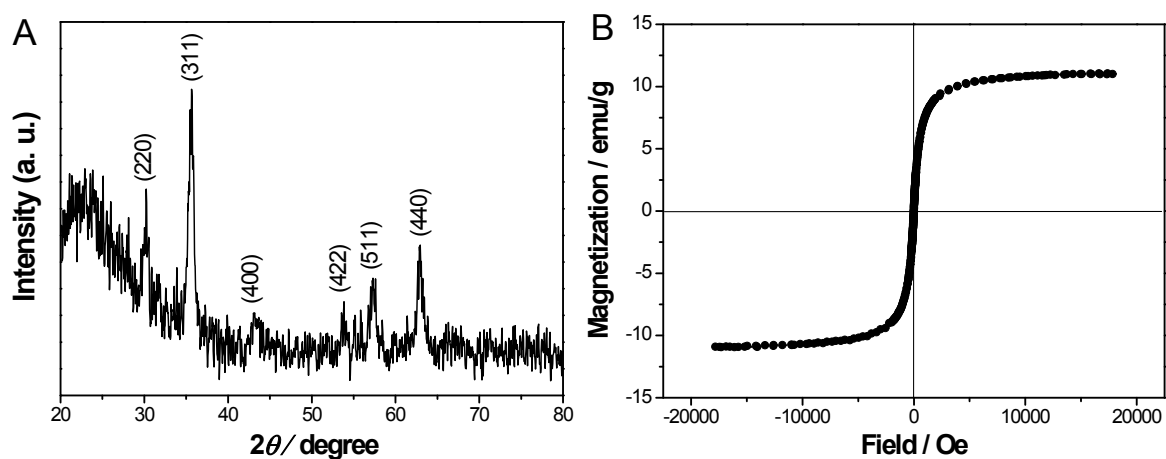

**Fig. S4** (A) Wide-angle XRD pattern and (B) magnetization curve of calcined sample prepared using  $\text{C}_{16}\text{mimCl}$  as template in the  $\text{Fe}_3\text{O}_4/\text{C}_{16}\text{mimCl}/\text{C}_{16}\text{mimCl}$  magnetic fluid with an initial molar ratio  $n(\text{Fe}_3\text{O}_4/\text{C}_{16}\text{mimCl}/\text{C}_{16}\text{mimCl})/n(\text{TEOS})$  of 0.05.

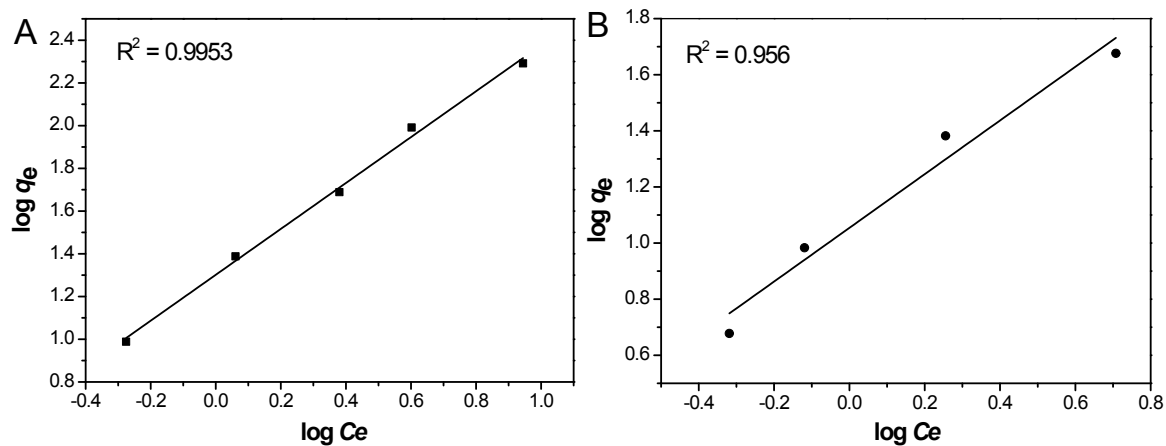

**Fig. S5** Linear relation fitted by Freundlich isotherm equation for (A) RhB and (B) MB solutions adsorbed on  $\text{Fe}_3\text{O}_4/\text{MCM-41}$ .

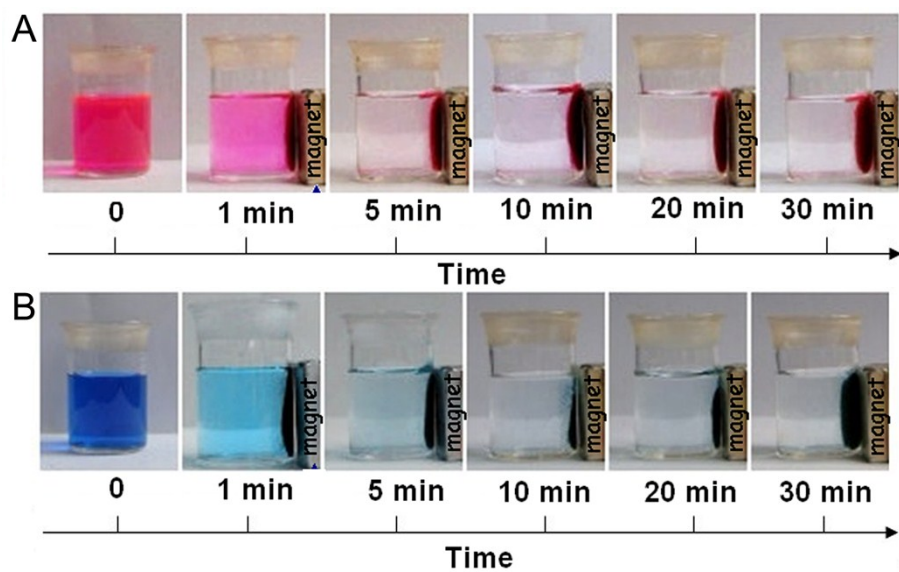

**Fig. S6** Digital photographs of separated effect of (A) rhodamine B and (B) methylene blue solutions ( $100 \text{ mg L}^{-1}$ ) after adsorption on  $\text{Fe}_3\text{O}_4/\text{MCM-41}$  at different time interval, and a permanent magnet was placed next to the solution.
